# Supplementary material for: Comparative Study on the Oxidative Stability of Encapsulated Fish Oil by Monoaxial or Coaxial Electrospraying and Spray-Drying
Source: MDPI journal article supplement (doi:10.3390/antiox12020266), 2023-01-24
Supplement: s1 [file s1]

## SUPPLEMENTARY MATERIAL

(A)

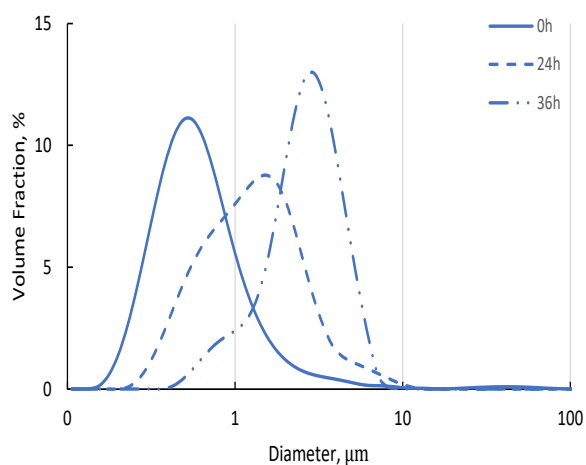

(B)

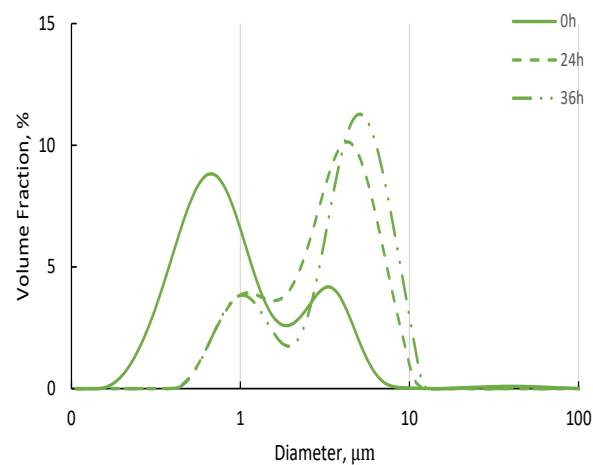

Figure S1. Oil droplet size distribution of the fish-oil-loaded emulsions produced for monoaxial electrospraying during processing (0h, 24h, 36h): GS-mo (A) and MD-mo (B).

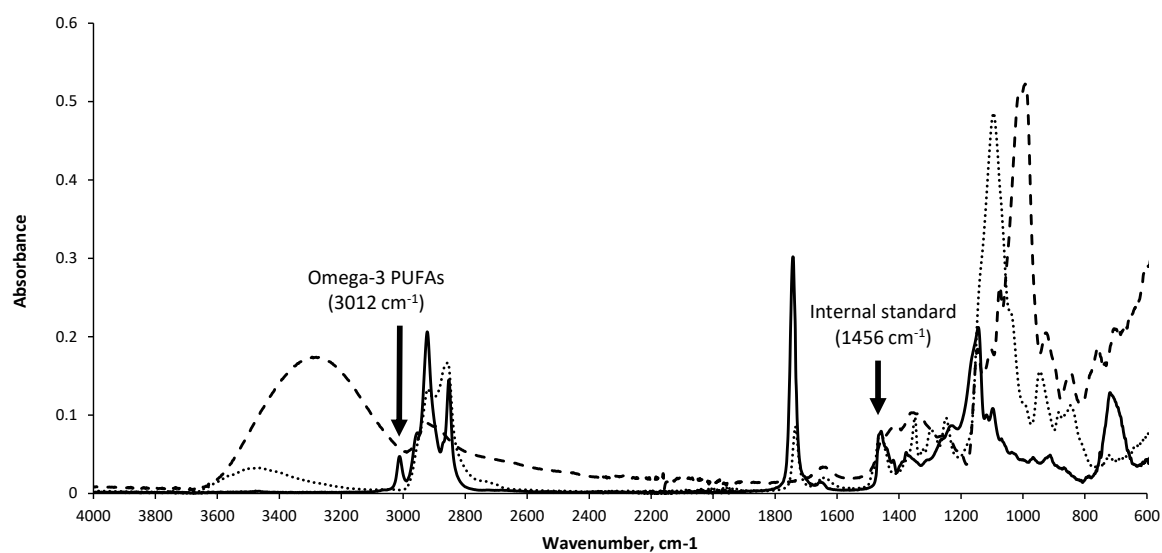

Figure S2. ATR-FTIR spectra of the: fish oil (solid line), glucose syrup (dashed line) and Tween-20 (dotted line).

**(A)**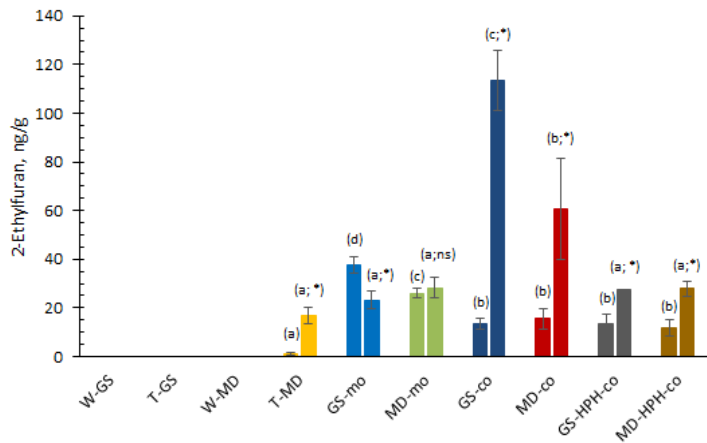**(B)**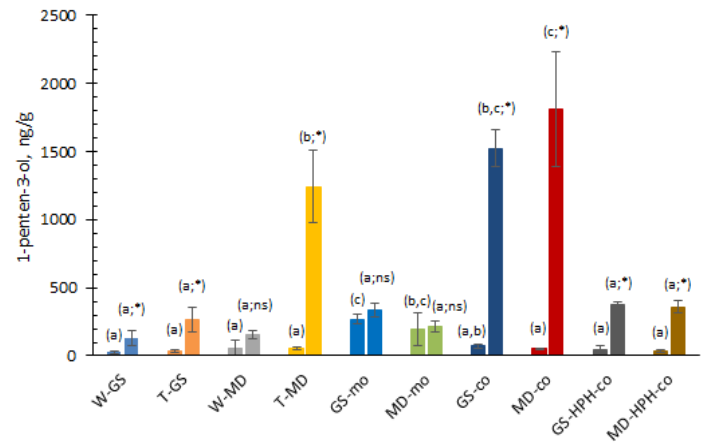**(C)**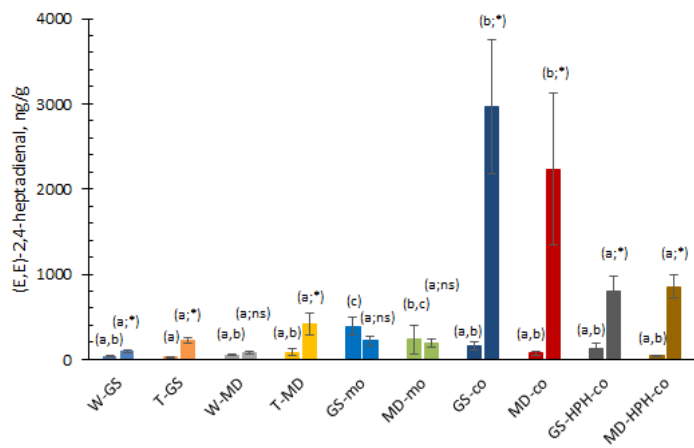**(D)**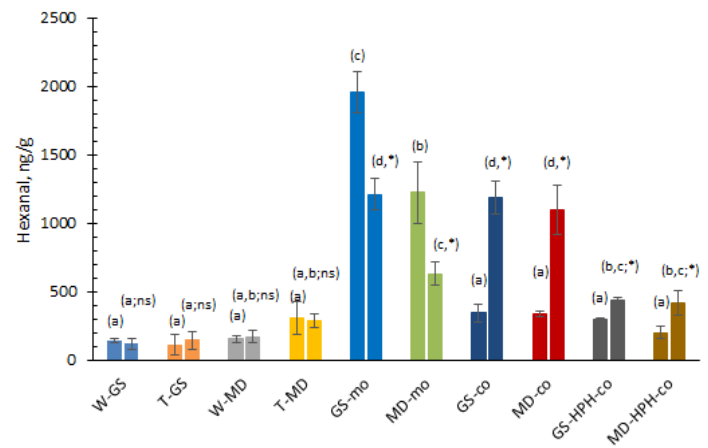**(E)**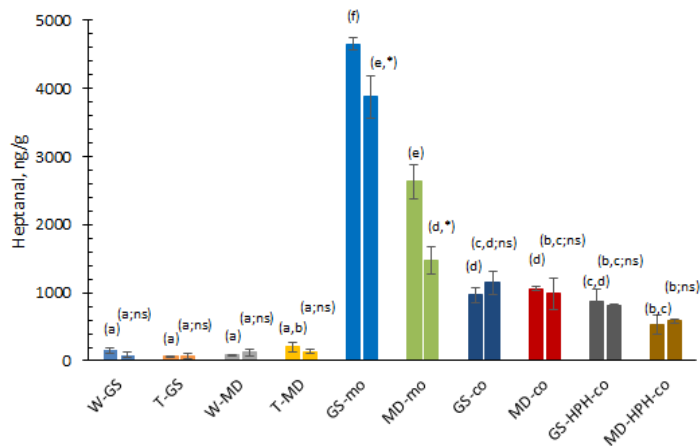

Figure S3. Secondary volatile oxidation products (SVOPs) of the fish-oil-loaded capsules produced by spray-drying or electrospraying (monoaxial and coaxial) at week 0 and week 6 of storage: 2-ethylfuran **(A)**; 1-penten-3-ol **(B)**; (*E,E*)-2,4-heptadienal **(C)**; hexanal **(D)**; heptanal **(E)**. Samples followed by a letter, a-d, indicates statistical differences ( $p \leq 0.05$ ) between samples at the same sampling point. Samples followed by an asterisk (\*) indicates statistical differences ( $p < 0.05$ ) between week 0 and week 6. Means within the same sample followed by “ns” indicates no statistical differences ( $p > 0.05$ ) between week 0 and week 6.
